# Supplementary material
Source: PubMed Central journal article supplement (PMC5992601)
Supplement: NIHMS970208-supplement-1.pdf [file NIHMS970208-supplement-1.pdf]

**Current Biology, Volume 28**

**Supplemental Information**

**Sleep Spindle Refractoriness Segregates**

**Periods of Memory Reactivation**

**James W. Antony, Luis Piloto, Margaret Wang, Paula Pacheco, Kenneth A. Norman, and Ken A. Paller**

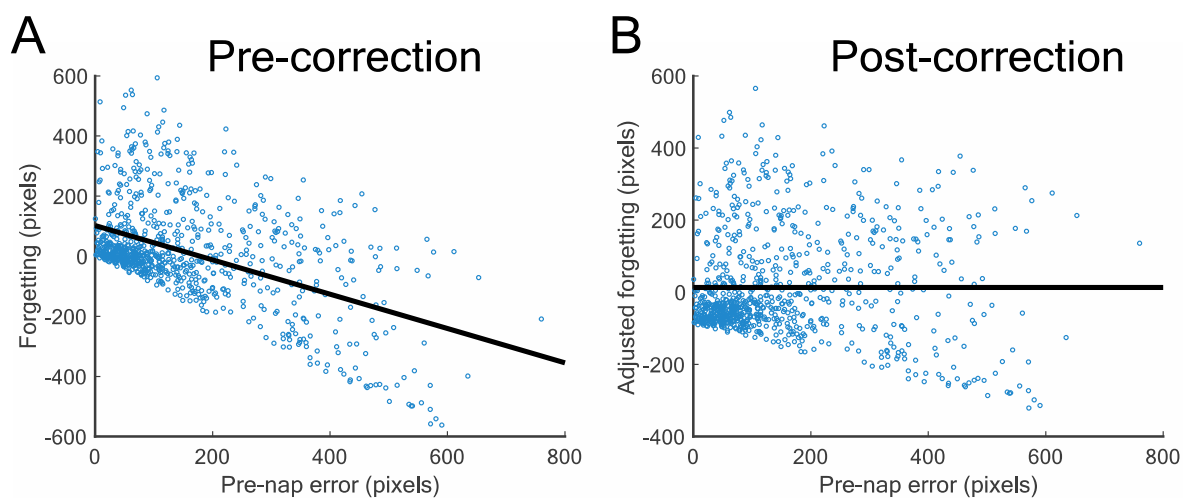

**Figure S1. Residual analysis used in the forgetting metric. Related to Figure 1. (A)** Pre-nap error significantly predicts forgetting (post- – pre-nap error). **(B)** Corrected (residual) forgetting values after regressing out pre-nap error.

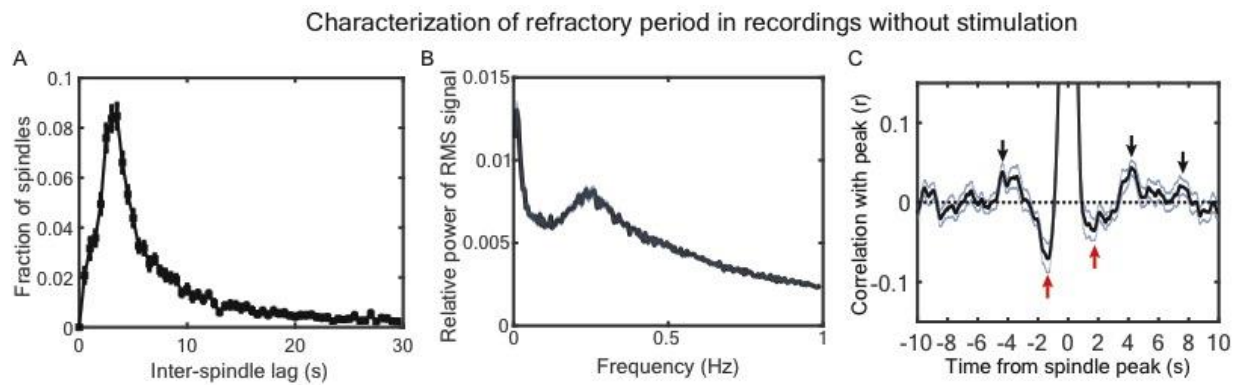

**Figure S2. Spindle refractory period analyses on non-TMR data. Related to Figure 3.** A-C represent a variant of the graphs from Figure 3A, B, and D using data from an experiment with no TMR cues ( $N=28$ ). We relied on data from the Pz electrode because EEG acquisition did not include CPz. All error measurements indicate SEM.

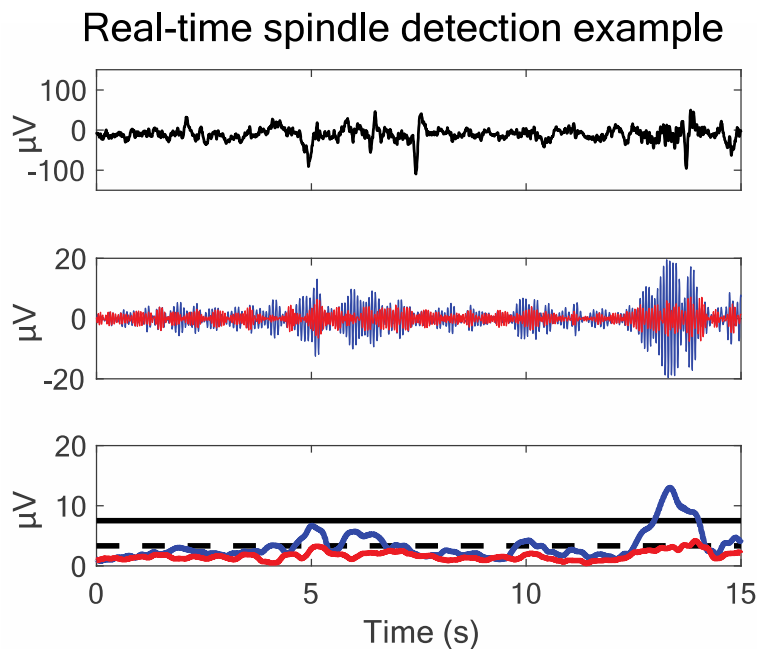

**Figure S3. Example of a spindle detected by online spindle algorithm. Related to Figure 4. (Top)** Raw EEG signal. **(Middle)** Signals filtered in the sigma (11-16 Hz, blue) and lower beta (16-21 Hz, red) bands. **(Bottom)** RMS sigma (blue) and lower beta (red) signals along with the first (dashed black) and second (solid black) spindle thresholds, which were multiplications of 2 and 4.5 times the mean lower beta power, respectively. Any sigma signal above the first threshold between 0.5 – 3 s and above the second threshold at any point was considered a spindle. One spindle was thus detected near the end of the interval.

| Time in each stage (min) |      | Wake  | S1   | S2    | S3     | REM  |
|--------------------------|------|-------|------|-------|--------|------|
| Exp 1                    | Mean | 27.69 | 5.78 | 24.25 | 20.81  | 3.08 |
|                          | SEM  | 3.96  | 0.69 | 2.90  | 4.20   | 1.07 |
| Exp 2                    | Mean | 21.22 | 5.97 | 22.69 | 20.16  | 4.28 |
|                          | SEM  | 3.51  | 0.95 | 2.54  | 3.23   | 1.35 |
| Exp 3                    | Mean | 21.43 | 5.83 | 26.68 | 17.45  | 4.98 |
|                          | SEM  | 3.59  | 0.56 | 2.49  | 2.41   | 1.53 |
| Mean sounds per stage    |      |       |      |       |        |      |
| Exp 1                    | Mean | 4.17  | 2.61 | 43.11 | 120.50 | 0.00 |
|                          | SEM  | 1.50  | 0.97 | 13.24 | 19.91  | 0.00 |
| Exp 2                    | Mean | 1.81  | 1.44 | 97.31 | 217.25 | 0.00 |
|                          | SEM  | 0.70  | 0.83 | 26.90 | 30.97  | 0.00 |
| Exp 3                    | Mean | 1.30  | 0.80 | 35.90 | 54.30  | 0.85 |
|                          | SEM  | 0.42  | 0.30 | 3.97  | 9.88   | 0.43 |

**Table S1. Sleep staging and cue quantification. Related to Figures 1 & 4.** Mean amount of time in each sleep stage (min  $\pm$  SEM) is displayed together with the number of cues per stage for Experiments 1, 2, and 3.

## Autocorrelation peaks

| Peak time (s) | Peak type  |
|---------------|------------|
| -8.414        | Negative   |
| -7.277        | Negative   |
| -5.941        | Positive   |
| -4.727        | Negative   |
| -3.240        | Positive † |
| -1.480        | Negative   |
| 0.000         | Positive   |
| 1.480         | Negative   |
| 3.016         | Positive   |
| 4.496         | Negative   |
| 5.547         | Positive   |
| 7.723         | Positive   |
| 8.371         | Negative   |

**Table S2. Timing of autocorrelation peaks in sigma RMS signal. Related to Figure 3.** Shown are all positive and negative autocorrelation peaks with each time point and  $t = 0$  from Figure 3D. Brackets indicate approximately symmetric peaks around  $t = 0$ . All peaks are significant at  $p < 0.05$  level, except †, where  $0.05 < p < 0.1$ .
